# Supplementary material
Source: PubMed Central journal article supplement (PMC2708961)
Supplement: jc.2008-2604_1.pdf [file jc.2008-2604_1.pdf]

Supplemental Table (Table 3). Number of subjects with safety parameters that were above or below the reference ranges at screening and day 21(or end of study visit for those who dropped from the study).

|                                        | Reference Range<br>Site 1 / Site2 | Screening                 |                           | Day 21                    |                           | P-value |
|----------------------------------------|-----------------------------------|---------------------------|---------------------------|---------------------------|---------------------------|---------|
|                                        |                                   | Number of Men Below Range | Number of Men Above Range | Number of Men Below Range | Number of Men Above Range |         |
| Total Cholesterol (mg/dL) <sup>a</sup> | 118 - 275                         | 1                         | 3                         | 4                         | 2                         | 0.34    |
| HDL Cholesterol (mg/dL) <sup>a</sup>   | 40 - 59                           | 52                        | 17                        | 80                        | 6                         | <0.0001 |
| LDL Cholesterol (mg/dL) <sup>a</sup>   | 80 - 179                          | 15                        | 9                         | 18                        | 5                         | 0.21    |
| Triglycerides (mg/dL) <sup>a</sup>     | 40 - 160                          | 15                        | 23                        | 12                        | 19                        | 0.50    |
| PSA (ng/mL) <sup>a</sup>               | 0 - 4                             | 0                         | 0                         | 0                         | 0                         | 1.00    |
| ALP (IU/L)                             | 38 – 126 /<br>35 - 109            | 2                         | 1                         | 2                         | 1                         | 1.00    |
| ALT (IU/L)                             | 17 – 63 /<br>12 - 79              | 6                         | 9                         | 10                        | 2                         | 0.03    |
| AST (IU/L)                             | 15 – 41 /<br>10 - 44              | 1                         | 9                         | 2                         | 5                         | 0.48    |
| Urea Nitrogen (mg/dL)                  | 8 – 20 /<br>8 - 21                | 6                         | 2                         | 7                         | 1                         | 0.80    |
| Creatinine (mg/dL)                     | 0.4 – 1.2 /<br>0.3 – 1.2          | 0                         | 6                         | 0                         | 8                         | 0.32    |
| Hemoglobin (g/dL)                      | 13.8 - 16.9 /<br>13 -18           | 3                         | 4                         | 4                         | 1                         | 0.20    |
| Hematocrit (L/L)                       | 39.9 - 50.4 /<br>38 - 50          | 3                         | 2                         | 3                         | 1                         | 0.85    |

<sup>a</sup> Currently accepted ranges in healthy adult men were used for both centers.
